# SDF1-Induced Antagonism of Axonal Repulsion Requires Multiple G-Protein Coupled Signaling Components That Work in Parallel

E. Naomi Twery<sup>1</sup>, Jonathan A. Raper<sup>2\*</sup>

**1** Neuroscience Graduate Group, University of Pennsylvania School of Medicine, Philadelphia, Pennsylvania, United States of America, **2** Department of Neuroscience, University of Pennsylvania School of Medicine, Philadelphia, Pennsylvania, United States of America

## Abstract

SDF1 reduces the responsiveness of axonal growth cones to repellent guidance cues in a pertussis-toxin-sensitive, cAMP-dependent manner. Here, we show that SDF1's antirepellent effect can be blocked in embryonic chick dorsal root ganglia (DRGs) by expression of peptides or proteins inhibiting either  $G\alpha_i$ ,  $G\alpha_q$ , or  $G\beta\gamma$ . SDF1 antirepellent activity is also blocked by pharmacological inhibition of PLC, a common effector protein for  $G\alpha_q$ . We also show that SDF1 antirepellent activity can be mimicked by overexpression of constitutively active  $G\alpha_i$ ,  $G\alpha_q$ , or  $G\alpha_s$ . These results suggest a model in which multiple G protein components cooperate to produce the cAMP levels required for SDF1 antirepellent activity.

**Citation:** Twery EN, Raper JA (2011) SDF1-Induced Antagonism of Axonal Repulsion Requires Multiple G-Protein Coupled Signaling Components That Work in Parallel. PLoS ONE 6(4): e18896. doi:10.1371/journal.pone.0018896

**Editor:** Edward Giniger, National Institutes of Health (NIH), United States of America

**Received:** December 22, 2010; **Accepted:** March 24, 2011; **Published:** April 27, 2011

**Copyright:** © 2011 Twery, Raper. This is an open-access article distributed under the terms of the Creative Commons Attribution License, which permits unrestricted use, distribution, and reproduction in any medium, provided the original author and source are credited.

**Funding:** This work was funded by the National Institutes of Health, <http://www.nih.gov/>, via RO1-DA025407 from NIDA to JAR. Additional support for ENT came from training grants T32HD007516 and GM-7229-36 to the University of Pennsylvania. The funders had no role in study design, data collection and analysis, decision to publish, or preparation of the manuscript.

**Competing Interests:** The authors have declared that no competing interests exist.

\* E-mail: [raperj@mail.med.upenn.edu](mailto:raperj@mail.med.upenn.edu)

## Introduction

The development of the nervous system requires the formation of numerous precise connections between neurons and their targets. Growth cones navigate through complex environments in which they are simultaneously exposed to many different guidance cues. Understanding how a growth cone integrates competing cues into a unitary guidance decision is a major challenge. One region of the developing nervous system in which axons are faced with competing guidance information is the developing optic nerve. For example, as axons leave the eye, they are simultaneously exposed to the potent repellent slit2 and to the chemokine SDF1, both of which are expressed along the optic stalk [1-5]. The presence of slit2 might be expected to preclude retinal extension, but SDF1 can mitigate its repellent effects. SDF1, acting through its G-protein coupled receptor CXCR4, has been shown to reduce the sensitivity of growth cones to a variety of repellents *in vitro* including slit2 [6].

The signaling pathway through which SDF1 reduces growth cone responses to repellents has been studied using wholly pharmacological approaches [6,7]. SDF1's anti-repellent activity in primary neurons is blocked by pertussis toxin, which inhibits  $G\alpha_i$  or  $G\alpha_o$ , and calmidazolium chloride, which inhibits calmodulin. SDF1 activity is also blocked by the PKA inhibitors PKI and Rp-cAMPs, and mimicked by the cAMP analogue Sp-cAMPs. Further, SDF1 activity is blocked by knockdown of the calcium/calmodulin-stimulated adenylylase ADCY8 [8]. These findings suggest that increased cAMP levels are a component of the SDF1 antirepellent pathway, despite the apparent requirement for G proteins that canonically induce decreased cAMP levels. Although these studies provide an essential

outline of the pathway, they leave many questions unanswered. One of these is how a pertussis toxin-sensitive pathway could lead to increased, rather than decreased, cAMP.

To better understand how CXCR4 activation increases cAMP levels, we began by investigating the identities of the G proteins required for antirepellent activity. We transfected primary neuronal cultures with constructs designed to block specific  $G\alpha$  or  $G\beta\gamma$  subunits and assayed their effects on antirepellent signaling. Working downstream from these signaling components, we then examined the involvement of phospholipase C (PLC) in SDF1 signaling.

Here, we demonstrate that SDF1's antirepellent activity requires two distinct G alpha subunits,  $G\alpha_i$  and  $G\alpha_q$ . We also show that anti-repellent signaling is abrogated by a  $G\beta\gamma$  scavenger, GRK-CT. These results suggest that  $G\alpha_i$ ,  $G\alpha_q$ , and  $G\beta\gamma$  all cooperate to generate SDF1 antirepellent activity. We also show that antirepellent signaling is blocked by PLC inhibitors. Taken together with previous findings, these results are consistent with SDF1/CXCR4 signaling acting through multiple G protein subunits that work together to activate PLC, which in turn ultimately leads to elevated internal calcium levels that stimulate the calcium/calmodulin-dependent adenylylase ADCY8 to produce cAMP.

## Materials and Methods

### Ethics statement

Chick embryos were maintained according to University of Pennsylvania Institutional Animal Care and Use Committee (IACUC) guidelines, approved as protocol #802243.

## Cell culture and explant-based collapse assays

Fertile chicken eggs were purchased from B&E Eggs, York Springs, PA. DRGs were dissected from E7 chick embryos and grown on laminin-coated coverslips in F12 supplemented medium as previously described [1]. Explants were cultured for 18–20 hours before treatment. SDF1 (50 nM, Invitrogen), supernatant from sema3A-transfected 293T cells, and/or pharmacological inhibitors as noted were added to wells at the same time. Cells were returned to the incubator for 30 minutes and then fixed for at least 30 minutes with 4% paraformaldehyde plus 10% sucrose in PBS. Growth cones were examined on an Axiovert 35 (Zeiss) with phase optics and scored as collapsed if they had no lamella and no more than two filopodia as described in [9]. Numbers of collapsed and uncollapsed growth cones from pairs of treatment conditions were compared with a two-tailed Fisher Exact Test and considered significant if  $p < 0.05$ . Statistical comparisons were performed with Prism (GraphPad, La Jolla, CA).

## Transfection

E7 chick DRGs were dissociated by incubation with 0.25% trypsin-EDTA (Invitrogen) for 20 minutes at 37°C and then resuspended in Amaxa nucleofector solution. Cells from 12 ganglia were electroporated with 4  $\mu$ g total plasmid DNA using the G-013 program for the rat neuron kit and the Amaxa nucleofector (Lonza). Plasmid volume varied from 3–10  $\mu$ L, depending on plasmid concentration. Cells were cotransfected with EYFP or Citrine (2  $\mu$ g) and an experimental plasmid (2  $\mu$ g). Transfected cells were cultured as described above for 24 hours before treatment with sema3A supernatant. Plasmid-expressing cells were identified by expression of EYFP or Citrine and counts of brightly green growth cones were analyzed as above.

## Plasmids and Reagents

Expression plasmids for constitutively active G proteins, RGS proteins, and dominant-negative  $G\alpha_i$  were obtained from the Missouri Science and Technology cDNA Resource Center (Rolla; cdna.org). An expression plasmid containing GRK-CT was provided by P. Alberts [10]. Expression plasmids encoding G protein interfering peptides were obtained from Cue Biotech [11]. The PLC inhibitor U73122 (Sigma) was used at 20nM.

## Immunostaining

Fixed cultures were washed once with PBS and 3 times with PBS + 0.1% Triton-X100, then blocked for half an hour in blocking reagent: PBS + 3% bovine albumin, 1% PVP-10, 1% PVP-40, and 0.1% PVP-360 (Sigma) with 0.2% Triton-X100 added. Goat anti-GFP (Rockland) or mouse anti-HA (Covance) were used at 1:500 and visualized with AlexaFluor secondary antibodies (Invitrogen). Cultured cells were imaged either on a Zeiss Axiovert 35 with a 63 $\times$  objective or on a (Leica Confocal) with a 63 $\times$  objective and 3 $\times$  zoom. Multiple colors were imaged with line-by-line sequential scanning.

## Results

### Blocking $G\alpha_i$ or $G\alpha_q$ blocks SDF1 antirepellent activity

Semaphorin 3A (sema3A) is a powerful repellent for dorsal root ganglion (DRG) axons [12]. Bath application of sema3A to DRG growth cones induces them to transition from a spread motile morphology to a collapsed shape without lamellae and few filopodia (Luo et al., 1993). This dramatic change in morphology can be used to measure the strength of repellent cues or to measure the relative susceptibility of growth cones to repellent cues. Using this assay, the repellent responses of DRG growth

cones to sema3A, sympathetic growth cones to sema3C, or retinal growth cones to slit2, have all been shown to be greatly reduced in the presence of the chemokine SDF1 [6]. SDF1 by itself has little discernible effect on these growth cones, but when SDF1 is present, 5 to 8 times more repellent is required to induce half maximal growth cone collapse [6].

SDF1 acts through its seven transmembrane receptor, CXCR4, to mitigate the ability of repellents to collapse growth cones [6]. Paradoxically, although its signaling pathway in primary neurons is blocked by the  $G\alpha_{i/o}$  blocker pertussis toxin [6], SDF1 appears to induce increased cAMP levels. Previous work from our laboratory showed that SDF1's antirepellent effects can be blocked by the cAMP antagonist RpAMPs or mimicked by the cAMP analogue SpcAMPs [6]. An SDF1-induced rise in cAMP has been observed in cultured primary chick retinal neurons [8]. To better define the specific G-protein components through which SDF1 acts, dissociated DRGs were co-transfected with expression constructs for EYFP along with plasmids encoding short peptides that selectively block signaling through specific  $G\alpha$  containing G-proteins. These peptides are derived from the C termini of the  $G\alpha$  proteins they target and they selectively compete with the targeted  $G\alpha$  proteins for receptor binding [11]. Their selectivity and effectiveness has been demonstrated in several other systems, including zebrafish [13] and fly [14].

DRG neurons transfected with EYFP alone collapse in response to sema3A (Fig. 1A; compare the first and second grey bars in Fig. 1C, D). The presence of SDF1 makes DRG growth cones resistant to sema3A (Fig. 1A; compare second and third grey bars in Fig. 1C, D). For these experiments, transfected DRG cultures were stained for EYFP and only those growth cones that were brightly fluorescent were counted. In EYFP-only conditions, cultures show low background collapse. The percentage of collapsed growth cones increases in the presence of sema3A but increases significantly less when SDF1 is added along with sema3A. Co-transfection of expression plasmids encoding EYFP along with peptides targeting  $G\alpha_{q/11}$  (Fig. 1C, first panel) or  $G\alpha_{i1/2}$  (Fig. 1C, second panel) have no effect upon DRG growth cone collapse in the presence of sema3A alone (compare the middle grey bars to the middle black bars). However, the  $G\alpha_{q/11}$  or  $G\alpha_{i1/2}$  peptides do block SDF1's ability to reduce collapse in response to sema3A (compare the third grey bars to the third black bars). This suggests that both  $G\alpha_q$  and  $G\alpha_i$  mediated G-protein coupled signaling are each required for SDF1's antirepellent effect. A full-length dominant negative  $G\alpha_i$  that has been shown to be effective in transfected CHO cells [15] was tested for its ability to block SDF1-mediated signaling. This construct also blocked the SDF1 antirepellent effect, corroborating the finding with the  $G\alpha_i$  based peptide (Fig. 1C, third panel). Co-transfection of EYFP with peptides targeting  $G\alpha_s$  or  $G\alpha_{o1}$  had no effect on DRG responses to sema3A or to SDF1 (Fig. 1D). Because the effectiveness of the  $G\alpha_s$  and  $G\alpha_{o1}$  peptides have been tested in other systems [16,17], the  $G\alpha_{i1/2}$  and  $G\alpha_q$  peptides were effective, and all interfering peptides were expressed from identical expression plasmids, we conclude that  $G\alpha_s$  and  $G\alpha_o$  are unlikely to be required for antirepellent activity.

### Both $G\beta\gamma$ and $G\alpha$ are necessary for SDF1 antirepellent activity

Because the short inhibitory peptides we used block the initial receptor mediated dissociation and activation of G proteins, they cannot determine whether SDF1 signaling depends upon alpha or beta-gamma subunits to activate downstream targets. We used the C-terminal portion of GRK2, or GRK-CT, as a  $G\beta\gamma$  scavenger that should prevent the complex from stimulating downstream

**A**

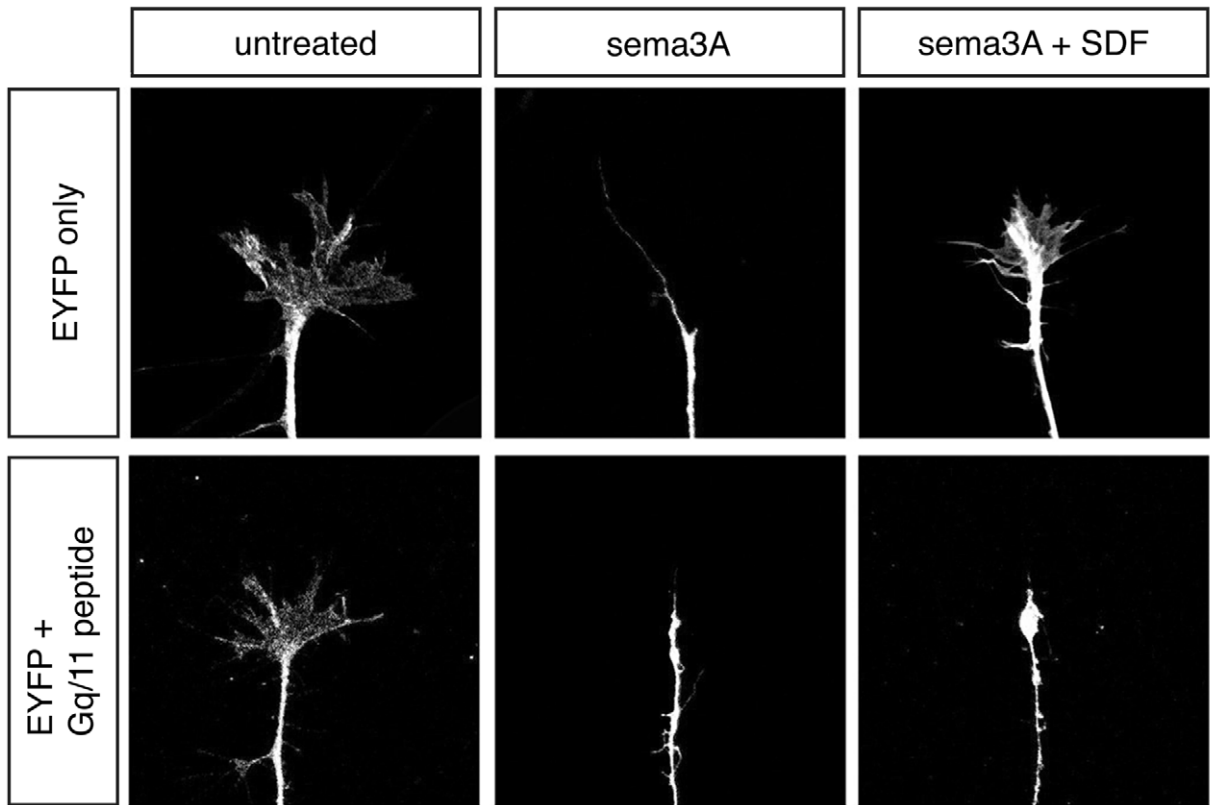

**B**

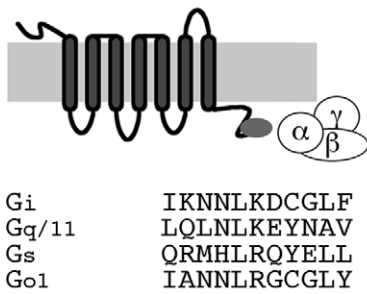

**D**

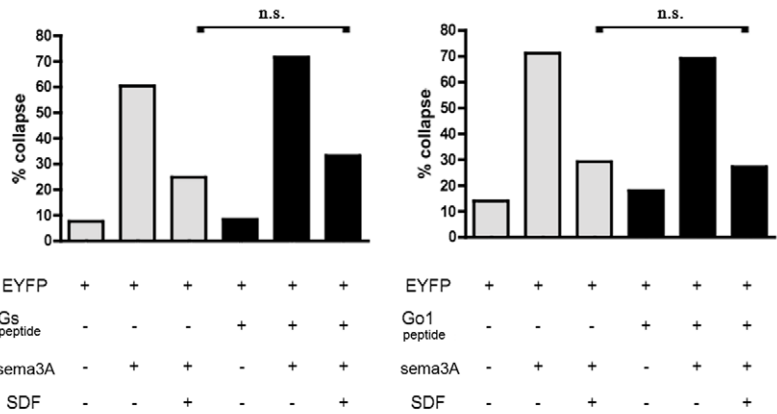

**C**

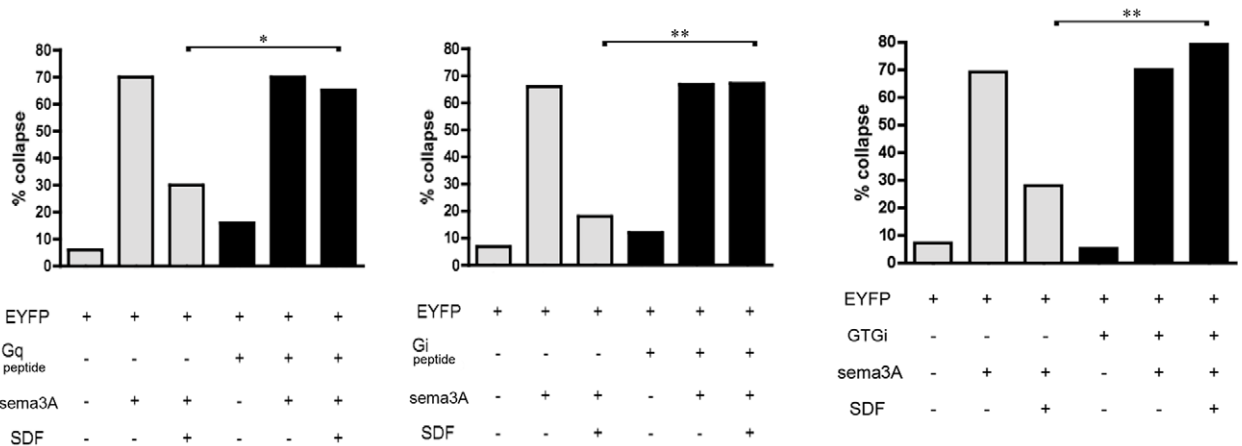

**Figure 1. Competitive inhibitors of  $G\alpha_i$  or  $G\alpha_{q/11}$ , but not  $G\alpha_s$  or  $G\alpha_o$ , block SDF1 mediated antirepellent activity.** (A) Growth cones of dissociated DRGs transfected with EYFP or EYFP + Gq/11 inhibitory peptide have motile lamellae and filopodia. (B) Specific inhibitory  $G\alpha$  peptides (medium grey) bind selected GPCRs and prevent their association with functional G proteins containing the same  $G\alpha$  peptide sequence. (C,D) Dissociated DRGs were transfected with EYFP-only (grey bars) or with EYFP and an experimental construct (black bars). After 24 h in culture, cells were treated for 30' with sema3A or with sema3A + SDF1. (C) The SDF1 antirepellent response is blocked by peptides targeting  $G\alpha_i$  or  $G\alpha_{q/11}$ , and also by a full-length dominant-negative  $G\alpha_i$ . (D) The SDF1 antirepellent response is not affected by peptides targeting  $G\alpha_s$  or  $G\alpha_o$ . \*,  $p < 0.001$ ; \*\*,  $p < 0.0001$ . doi:10.1371/journal.pone.0018896.g001

targets (Fig. 2A). Ghahremani et al. [10] showed that this protein fragment could block  $G\beta\gamma$ -specific calcium release in LD2S cells and this construct has since been widely used. Coexpression of GRK-CT with EYFP does not increase background collapse or interfere with growth cones' responses to sema3A (Fig. 2B). GRK-CT does, however, block SDF1-induced reduction in sema3A-mediated growth cone collapse, suggesting that SDF1 antirepellent activity requires  $G\beta\gamma$ -induced activation of downstream targets.

We next set out to determine whether specific  $G\alpha$  subunits activate downstream targets in SDF1 mediated antirepellent signaling. RGS proteins act as GAPs for  $G\alpha$  subunits (Fig 2C). RGS2 specifically binds and inactivates  $G\alpha_q$ , and RGS4 primarily

binds  $G\alpha_i$  but also binds  $G\alpha_{q1}$  to a lesser extent [18,19]. Coexpression of either RGS2 or RGS4 with EYFP does not affect background levels of collapse, nor does it interfere with sema3A induced collapse (Fig. 2D). Expression of either RGS2 or RGS4 does however, interfere with SDF1's ability to reduce collapse in response to sema3A (Fig. 2D). These results suggest that  $G\alpha_q$ , and possibly  $G\alpha_i$ , activate downstream targets in the SDF1 mediated antirepellent pathway.

### Constitutively active $G\alpha$ subunits

We next asked whether overexpression of specific constitutively active  $G\alpha$  subunits can mimic SDF1 induced antirepellent activity.

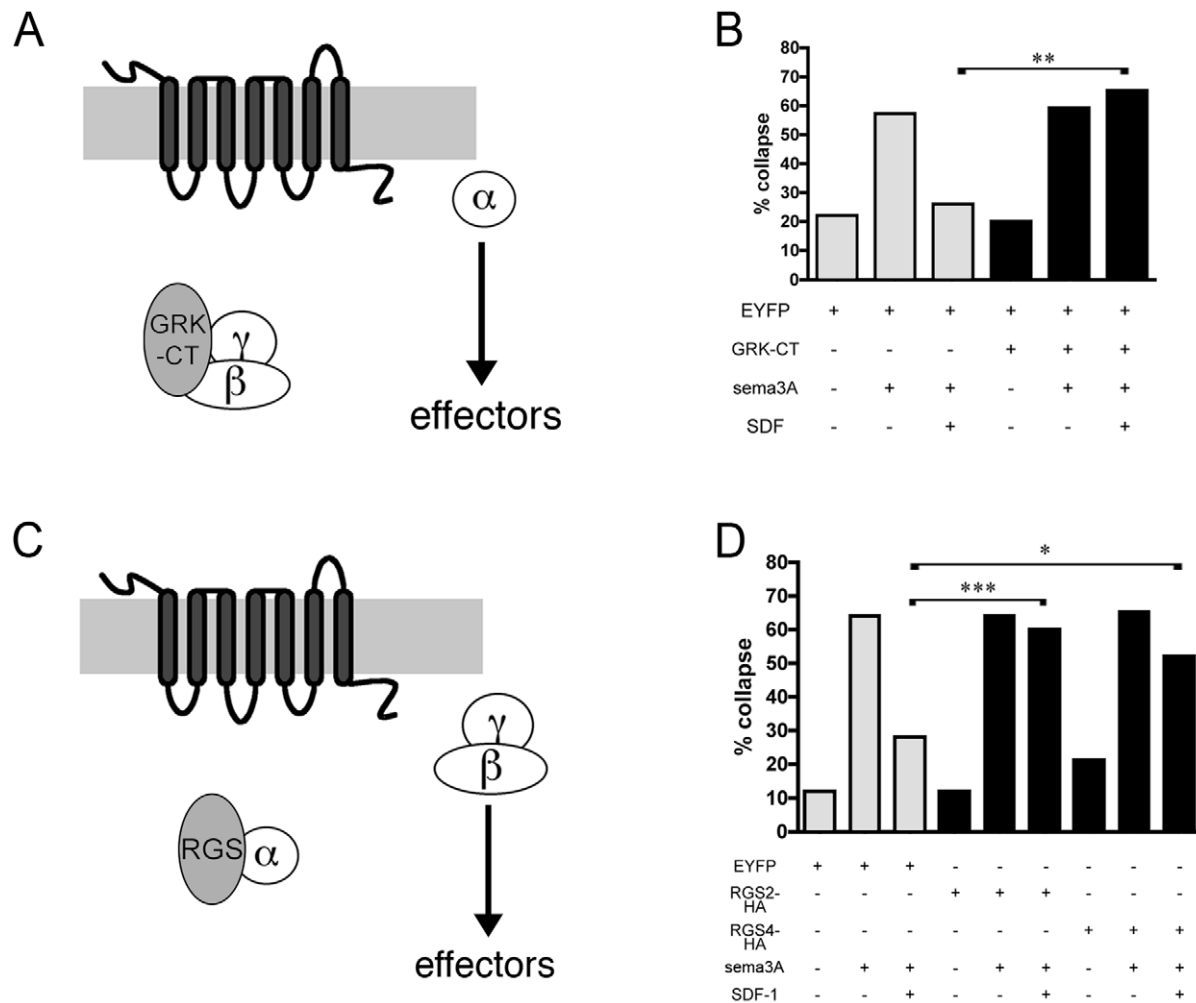

**Figure 2. Scavengers of  $G\beta\gamma$ ,  $G\alpha_i$ , or  $G\alpha_q$  subunits block SDF1 antirepellent activity.** (A) GRK-CT sequesters  $\beta\gamma$  subunits while leaving  $\alpha$  free to activate downstream effectors. (B) Transfection of dissociated DRGs with GRK-CT blocks the SDF1 antirepellent effect but does not alter background collapse or response to sema3A. (C) RGS proteins sequester specific  $\alpha$  subunits and hasten their inactivation while leaving  $\beta\gamma$  subunits free to activate downstream effectors. (D) Transfection of dissociated DRGs with either RGS2, a  $\alpha_q$  specific GAP, or RGS4, an  $\alpha_i$  and to a lesser extent  $\alpha_q$  specific GAP, block SDF1 antirepellent activity without affecting background collapse or response to sema3A. \*,  $p < 0.05$ ; \*\*,  $p < 0.005$ ; \*\*\*,  $p < 0.001$ . doi:10.1371/journal.pone.0018896.g002

$G\alpha$  subunits with a Q to L mutation in the nucleotide-binding region are unable to cleave GTP and are thereby made constitutively active [20-23]. Coexpression of QL  $G\alpha_s$  with EYFP made DRG growth cones insensitive to sema3A in a manner similar to SDF1, and what is more, SDF1 induced little additional antirepellent effect (Fig. 3A). Similar results were obtained with constitutively active  $G\alpha_i$  (Fig. 3C) or QL  $G\alpha_q$  (Fig. 3D). QL  $G\alpha_o$  had no effect on growth cone responses to either sema3A or SDF1 (Fig. 3B). These results suggest that  $G\alpha_s$ ,  $G\alpha_q$ , or  $G\alpha_i$  each individually have the capability of initiating signaling events similar to those induced by SDF1, whether or not they participate in SDF1 signaling under normal circumstances.

### Inhibition of phospholipase C blocks SDF1 antirepellent activity

Because phospholipase C (PLC) is a classical effector of  $G\alpha_{q/11}$ -class G proteins [24,25], and since our results show a requirement for  $G\alpha_{q/11}$  activity in SDF1 mediated antirepellent signaling, we hypothesized that PLC is required for SDF1's antirepellent activity. The PLC inhibitor U73122 has no effect on background

collapse or on growth cone responsiveness to sema3A (Fig. 4, grey bars). U73122 does, however, block SDF1's ability to reduce growth cone responses to sema3A (Fig. 4, black bars).

### Inhibition of phospholipase C blocks antirepellent effects induced by constitutive $G\alpha_q$ activity

We next tested whether  $G\alpha_q$  activation can induce an antirepellent response through the activation of PLC. As already demonstrated, sensory axons expressing a control Citrine construct collapse in response to sema3A and this collapse is largely mitigated in the presence of SDF1 (Figure 5, empty bars). In contrast, growth cones expressing the constitutively active QL  $G\alpha_q$  are insensitive to sema3A. (Figure 5, grey bars). Significant sensitivity to sema3A is restored, however, when PLC is blocked. Growth cones expressing QL  $G\alpha_s$  are also insensitive to sema3A, but this insensitivity is not reversed by blocking PLC (Figure 5, black bars). These findings are consistent with the idea that SDF1 induced antirepellent activity is mediated by  $G\alpha_q$  activation of PLC, while constitutively active  $G\alpha_s$  mediated antirepellent activity is not. As discussed in more detail below, one attractive

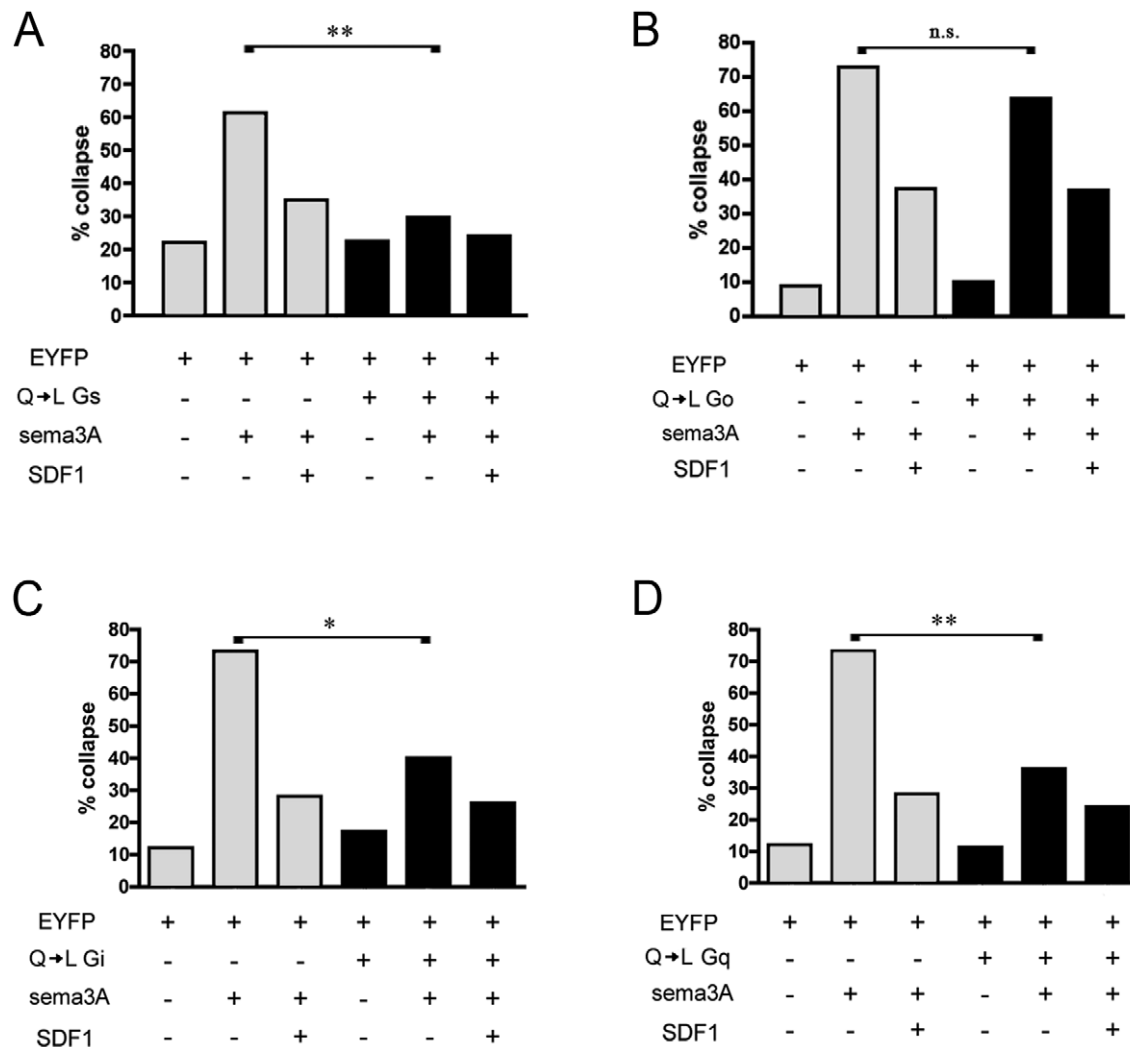

**Figure 3. Constitutively active  $G\alpha_q$ ,  $G\alpha_i$ , or  $G\alpha_s$  mimic SDF1's antirepellent effect.** (A) Transfection of QL  $G\alpha_s$  into DRGs makes them unresponsive to sema3A. (B) Transfection of QL  $G\alpha_o$  into DRGs has no effect on their responses to sema3A or SDF1. (C) Transfection of DRGs with QL  $G\alpha_i$  or with (D) QL  $G\alpha_q$  makes DRGs unresponsive to sema3A. \*,  $p < 0.001$ , \*\*,  $p < 0.0001$ . doi:10.1371/journal.pone.0018896.g003

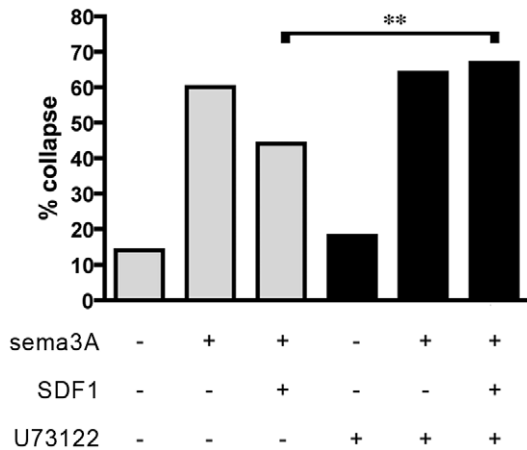

**Figure 4. Inhibiting PLC blocks SDF1 antirepellent activity.** DRG explants were treated with 20 nM PLC inhibitor U73122 (black bars). U73122 does not alter background collapse or DRG responsiveness to sema3A, but does block the antirepellent effect of SDF1. \*\*,  $p < 0.0001$ . doi:10.1371/journal.pone.0018896.g004

explanation for these observations is that SDF1 induced activation of PLC indirectly induces elevated cAMP levels through a separate mechanism from the more traditional direct activation of adenylate cyclases by  $G\alpha_s$ .

## Discussion

Although G protein coupled receptors (GPCRs) are often pictured as acting through specific, dedicated G proteins, it is now known that a single GPCR can bind and activate G proteins from more than one G alpha class [see 26]. PAR1, a thrombin receptor, can bind to  $G\alpha_{i/o}$ ,  $G\alpha_q$ , or to  $G\alpha_{12/13}$  [27].  $\beta_2$ -adrenergic receptors, when phosphorylated by PKA, switch affinities from  $G\alpha_s$  to  $G\alpha_i$  [28]. The class I metabotropic glutamate receptor mGluR1 has been shown to bind  $G\alpha_{i/o}$ ,  $G\alpha_{q/11}$ , and  $G\alpha_s$ , at least

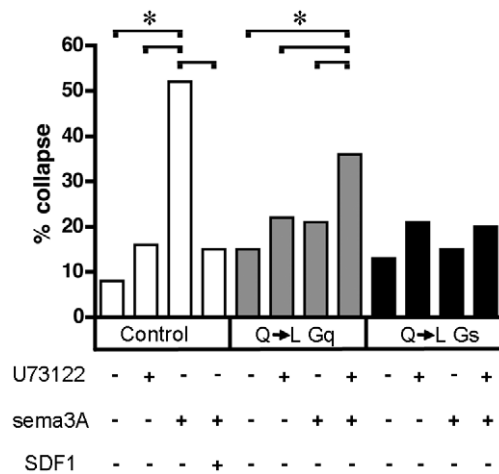

**Figure 5. Inhibiting PLC blocks antirepellent activity induced by expression of a constitutively active  $G\alpha_q$ .** DRGs were transfected with expression plasmids for Citrine (control, empty bars), Citrine and QL  $G\alpha_q$  (grey bars), or Citrine and QL  $G\alpha_s$  (black bars). Expression of QL  $G\alpha_q$  makes growth cones insensitive to sema3A unless the PLC blocker U73122 (20 nM) is also present. Growth cones expressing QL  $G\alpha_s$  are insensitive to sema3A in both the absence and the presence of U73122. \*,  $p < 0.002$ . doi:10.1371/journal.pone.0018896.g005

in certain cell types [29]. Wang et al. [30] found that parathyroid hormone receptor 1 regulates different genes with different G proteins or combinations of G proteins, suggesting that individual G proteins might be required for some cell behaviors but not for others. These are just a few of the many examples of GPCRs coupling to multiple G proteins.

Chemokine receptors as a class are generally thought to signal through  $G\alpha_{i/o}$ -type G proteins to decrease cAMP, activate PI3K, and activate both p38 and ERK1/2 MAP Kinases (see [31,32] for reviews). PI3K activation leads to activation of a number of other kinases, including Akt. SDF1 signaling through the chemokine receptor CXCR4 is also associated with changes in transcription, usually mediated through MAPK or Akt, that contribute to cell survival [4,33–35]. However, several groups have found that CXCR4 signals through other classes of G proteins. Maghazachi [36] reported that antibodies targeting  $G\alpha_o$  or  $G\alpha_q$ , but not  $G\alpha_i$ ,  $G\alpha_s$ , or  $G\alpha_z$ , could block SDF1-induced chemotaxis in natural killer cells. Soede et al. [37] found that CXCR4-dependent migration of myeloid leukemia cells require either the combination of  $G\alpha_i$  and  $G\alpha_q$  or  $G\alpha_q$  alone, depending on the destination tissue. Tan et al. [38] showed that SDF1/CXCR4-induced migration of Jurkat T cells required both  $G\alpha_{13}$ , which activated Rho, and  $G\alpha_i$ . These and other studies raised the possibility that SDF1/CXCR4 signaling in axon guidance might be more complex than that of the classic chemokine signaling pathway. Previous work from our laboratory [6] identified several components of SDF1/CXCR4 signaling in the antirepellent pathway, including a pertussis toxin-sensitive G protein, increased cAMP, and activation of PKA. In addition to the surprising apparent increase in cAMP levels observed in these previous studies, the effects of SDF1 on axonal responses to repellents were found to be independent of PI3K/Akt signaling and of MAPK.

The findings in this study show that SDF1's antirepellent activity can be blocked separately by  $G\alpha_i$ ,  $G\alpha_{q/11}$ , or  $G\beta\gamma$ -specific competitive inhibitors. These data suggest that each is required for the normal function of the antirepellent pathway. However, we also found that overexpression of constitutively active forms of  $G\alpha_i$  or of  $G\alpha_q$  can mimic application of SDF1. This suggests that either one of these signaling components is capable of stimulating a common downstream element that is sufficient for activation of the pathway. These findings are consistent with the idea that SDF1 stimulates multiple G protein coupled pathways to a degree that is insufficient for any one of them alone to induce a physiological response, but in combination, their actions sum to a level above a threshold for activation to produce an antirepellent response.

We also found that overexpression of a constitutively active  $G\alpha_s$  can mimic SDF1 even though a competitive inhibitor of  $G\alpha_s$  does not block SDF1 mediated signaling. As  $G\alpha_s$  is a canonical stimulator of adenylate cyclase activity and would be expected to elevate cAMP levels, this finding is consistent with the idea that the common element upon which  $G\alpha_i$ ,  $G\alpha_q$ , and  $G\beta\gamma$  all converge downstream from SDF1 activation of CXCR4 is elevated cAMP levels. Thus, our proposed model of the signaling pathway is that  $G\alpha_i$ ,  $G\alpha_q$ , and their associated  $\beta\gamma$  subunits all cooperate to increase the local concentration of cAMP, leading to suppression of axonal repulsion (Fig. 6). The ability of  $G\alpha_s$  to accomplish the same thing through a different route raises the possibility that a very wide range of GPCRs could influence axonal responses to repellents and axonal pathfinding.

Previous work has shown that SDF1's antirepellent activity requires calmodulin and the calcium/calmodulin-stimulated cyclase ADCY8 [6,8]. Xu [8] also showed by Förster resonance energy transfer (FRET) that SDF1 stimulates increased cAMP levels, and that this can be blocked by inhibition of calmodulin.

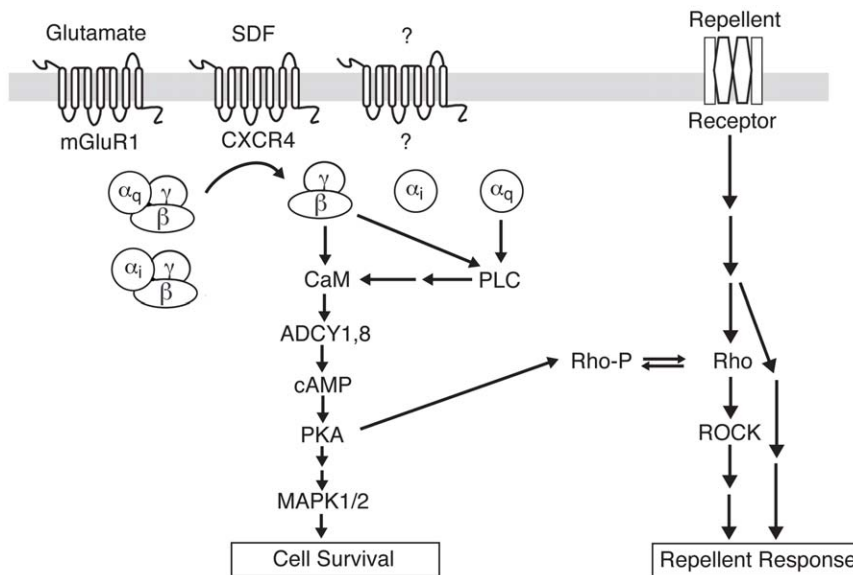

**Figure 6. A model for antirepellent signaling.** We identify roles for  $G\alpha_i$ ,  $G\alpha_q$ , and  $G\beta\gamma$ , as well as PLC, in the antirepellent response to SDF1. Previous work has shown requirements for calmodulin, ADCY8, cAMP, and PKA, along with inhibition of Rho and ROCK. In our model, CXCR4 activates  $G\alpha_i$  and  $G\alpha_q$ , and they and their associated  $G\beta\gamma$  subunits cooperate to activate PLC. PLC, through generation of diacylglycerol and inositol trisphosphate (Taylor et al., 1991), increases calcium levels. Increased calcium activates calmodulin, which in turn activates ADCY8 and thereby increases cAMP. Increased cAMP activates PKA, which phosphorylates MAPK1/2, leading to its activation and function in cell survival. PKA also phosphorylates Rho, which is thereby inactivated. This inactivation and the subsequent inactivation of ROCK are required for the antirepellent response to SDF1.

doi:10.1371/journal.pone.0018896.g006

$G\alpha_i$  and  $G\alpha_q$  are not ordinarily associated with increases in cAMP, yet our results show that they are required components in the antirepellent signaling pathway.  $G\alpha_q$  and  $G\beta\gamma$  activity, through the activation of PLC, can produce diacylglycerol and inositol trisphosphate and thereby increase intracellular calcium [39]. Thus, our present finding that both  $G\alpha_{q/11}$  and PLC are required for SDF1 antirepellent activity provides a connection between the G proteins activated by SDF1 and the calmodulin and calcium/calmodulin-stimulated cyclase that has been shown to increase cAMP downstream of SDF1. Our results are consistent with a signaling pathway (Fig. 6) in which multiple G protein components stimulate PLC activity that induces an increase in intracellular calcium levels and leads to the activation of calmodulin. Calmodulin, in turn, activates calcium/calmodulin-stimulated adenylate cyclases, such as ADCY8, and thereby increases cAMP.

Some of the important questions that remain include how elevated cAMP levels decrease growth cone responses to repellents and the degree to which this modulation of repellent effectiveness is important in axonal pathfinding *in vivo*. Both SDF1/CXCR4 activity and activity of the calmodulin-activated adenylate cyclases have a strong influence on axonal responses to the repellent slit *in vivo* [8]. Our findings in this study suggest that activation of a wide range of GPCRs that signal through  $G\alpha_i$ ,  $G\alpha_q$ , or  $G\alpha_s$  could potentially participate in axon guidance decisions.

## Author Contributions

Conceived and designed the experiments: ENT JAR. Performed the experiments: ENT. Analyzed the data: ENT. Contributed reagents/materials/analysis tools: JAR. Wrote the paper: ENT JAR.

## References

- Niclou SP, Jia L, Raper JA (2000) Slit2 is a repellent for retinal ganglion cell axons. *J Neurosci* 20(13): 4962–4974.
- Erskine L, Williams SE, Brose K, Kidd T, Rachel RA, et al. (2000) Retinal ganglion cell axon guidance in the mouse optic chiasm: Expression and function of robo and slits. *J Neurosci* 20(13): 4975–4982.
- Chalasanani SH, Sabol A, Xu H, Gyda MA, Rasband K, et al. (2007) Stromal cell-derived factor-1 antagonizes slit/robo signaling *in vivo*. *J Neurosci* 27(5): 973–980.
- Chalasanani S, Baribaud F, Coughlan C, Sunshine M, Lee V, et al. (2003) The chemokine stromal cell-derived factor-1 promotes the survival of embryonic retinal ganglion cells. *J Neurosci* 23(11): 4601–12.
- Li Q, Shirabe K, Thisse C, Thisse B, Okamoto H, et al. (2005) Chemokine signaling guides axons within the retina in zebrafish. *J Neurosci* 25(7): 1711–1717.
- Chalasanani S, Sabelko K, Sunshine M, Littman D, Raper J (2003) A chemokine, SDF-1, reduces the effectiveness of multiple axonal repellents and is required for normal axon pathfinding. *J Neurosci* 23(4): 1360–71.
- Kreibich TA, Chalasanani SH, Raper JA (2004) The neurotransmitter glutamate reduces axonal responsiveness to multiple repellents through the activation of metabotropic glutamate receptor 1. *J Neurosci* 24(32): 7085–7095.
- Xu H, Leinwand SG, Dell AL, Fried-Cassorla E, Raper JA (2010) The calmodulin-stimulated adenylate cyclase ADCY8 sets the sensitivity of zebrafish retinal axons to midline repellents and is required for normal midline crossing. *J Neurosci* 30(21): 7423–7433.
- Kapfhammer JP, Xu H, Raper JA (2007) The detection and quantification of growth cone collapsing activities. *Nat Protoc* 2(8): 2005–2011.
- Ghahremani M, Cheng P, Lembo P, Albert P (1999) Distinct roles for Galphai2, Galphai3, and gbeta gamma in modulation of forskolin- or gs-mediated cAMP accumulation and calcium mobilization by dopamine D2S receptors. *J Biol Chem* 274: 9238–45.
- Gilchrist A, Bunemann M, Li A, Hosey M, Hamm H (1999) A dominant-negative strategy for studying roles of G proteins *in vivo*. *J Biol Chem* 274(10): 6610–6.
- Luo Y, Raible D, Raper JA (1993) Collapsin: A protein in brain that induces the collapse and paralysis of neuronal growth cones. *Cell* 75(2): 217–227.
- Lin F, Sepich DS, Chen S, Topczewski J, Yin C, et al. (2005) Essential roles of  $G\alpha_{12/13}$  signaling in distinct cell behaviors driving zebrafish convergence and extension gastrulation movements. *J Cell Biol* 169(5): 777–787.
- Yao CA, Carlson JR (2010) Role of G-proteins in odor-sensing and CO<sub>2</sub>-sensing neurons in drosophila. *J Neurosci* 30(13): 4562–4572.
- Winitz S, Gupta S, Qian N, Heasley L, Nemenoff R, et al. (1994) Expression of a mutant Gi2 alpha subunit inhibits ATP and thrombin stimulation of a cytoplasmic phospholipase A<sub>2</sub>-mediated arachidonic acid release independent of Ca<sup>2+</sup> and mitogen-activated protein kinase regulation. *J Biol Chem* 269(3): 1889–95.

16. Rasenick MM, Watanabe M, Lazarevic MB, Hatta S, Hamm HE (1994) Synthetic peptides as probes for G protein function. carboxyl-terminal G alpha s peptides mimic gs and evoke high affinity agonist binding to beta-adrenergic receptors. *J Biol Chem* 269(34): 21519–21525.
17. Vanhauwe JF, Thomas TO, Minshall RD, Tirupathi C, Li A, et al. (2002) Thrombin receptors activate G(o) proteins in endothelial cells to regulate intracellular calcium and cell shape changes. *J Biol Chem* 277(37): 34143–34149.
18. Heximer SP (2004) RGS2-mediated regulation of gqalpha. *Methods Enzymol* 390: 65–82.
19. Huang C, Hepler JR, Gilman AG, Mumby SM (1997) Attenuation of gi- and gq-mediated signaling by expression of RGS4 or GAIP in mammalian cells. *Proc Natl Acad Sci U S A* 94(12): 6159–6163.
20. Graziano MP, Gilman AG (1989) Synthesis in escherichia coli of GTPase-deficient mutants of gs alpha. *J Biol Chem* 264(26): 15475–15482.
21. Hermouet S, Merendino JJ, Jr., Gutkind JS, Spiegel AM (1991) Activating and inactivating mutations of the alpha subunit of Gi2 protein have opposite effects on proliferation of NIH 3T3 cells. *Proc Natl Acad Sci U S A* 88(23): 10455–10459.
22. Kroll SD, Chen J, De Vivo M, Carty DJ, Buku A, et al. (1992) The Q205LGo-alpha subunit expressed in NIH-3T3 cells induces transformation. *J Biol Chem* 267(32): 23183–23188.
23. Kalinec G, Nazarali AJ, Hermouet S, Xu N, Gutkind JS (1992) Mutated alpha subunit of the gq protein induces malignant transformation in NIH 3T3 cells. *Mol Cell Biol* 12(10): 4687–4693.
24. Taylor SJ, Chae HZ, Rhee SG, Exton JH (1991) Activation of the beta 1 isozyme of phospholipase C by alpha subunits of the gq class of G proteins. *Nature* 350(6318): 516–518.
25. Smrcka AV, Hepler JR, Brown KO, Sternweis PC (1991) Regulation of polyphosphoinositide-specific phospholipase C activity by purified gq. *Science* 251(4995): 804–807.
26. Hermans E (2003) Biochemical and pharmacological control of the multiplicity of coupling at G-protein-coupled receptors. *Pharmacology and Therapeutics* 99: 25–44.
27. Gilchrist A, Vanhauwe JF, Li A, Thomas TO, Voyno-Yasnetskaya T, et al. (2001) G alpha minigenes expressing C-terminal peptides serve as specific inhibitors of thrombin-mediated endothelial activation. *J Biol Chem* 276(28): 25672–25679.
28. Daaka Y, Luttrell LM, Lefkowitz RJ (1997) Switching of the coupling of the beta2-adrenergic receptor to different G proteins by protein kinase A. *Nature* 390(6655): 88–91.
29. Selkirk JV, Price GW, Nahorski SR, Challiss RA (2001) Cell type-specific differences in the coupling of recombinant mGlu1alpha receptors to endogenous G protein sub-populations. *Neuropharmacology* 40(5): 645–656.
30. Wang J, Gilchrist A, Stern PH (2010) Antagonist minigenes identify genes regulated by parathyroid hormone through G protein-selective and G protein co-regulated mechanisms in osteoblastic cells. *Cell Signal*.
31. Rubin JB (2009) Chemokine signaling in cancer: One hump or two? *Semin Cancer Biol* 19(2): 116–122.
32. Teicher BA, Fricker SP (2010) CXCL12 (SDF-1)/CXCR4 pathway in cancer. *Clin Cancer Res* 16(11): 2927–2931.
33. Suzuki Y, Rahman M, Mitsuya H (2001) Diverse transcriptional response of CD4(+) T cells to stromal cell-derived factor (SDF)-1: Cell survival promotion and priming effects of SDF-1 on CD4(+) T cells. *J Immunol* 167(6): 3064–3073.
34. Vlahakis SR, Villasis-Keever A, Gomez T, Vanegas M, Vlahakis N, et al. (2002) G protein-coupled chemokine receptors induce both survival and apoptotic signaling pathways. *J Immunol* 169(10): 5546–5554.
35. Zheng H, Dai T, Zhou B, Zhu J, Huang H, et al. (2008) SDF-1alpha/CXCR4 decreases endothelial progenitor cells apoptosis under serum deprivation by PI3K/Akt/eNOS pathway. *Atherosclerosis* 201(1): 36–42.
36. Maghazachi AA (1997) Role of the heterotrimeric G proteins in stromal-derived factor-1alpha-induced natural killer cell chemotaxis and calcium mobilization. *Biochem Biophys Res Commun* 236(2): 270–274.
37. Soede RD, Wijnands YM, Kamp M, van der Valk MA, Roos E (2000) Gi and Gq/11 proteins are involved in dissemination of myeloid leukemia cells to the liver and spleen, whereas bone marrow colonization involves Gq/11 but not gi. *Blood* 96(2): 691–698.
38. Tan W, Martin D, Gutkind JS (2006) The Galpha13-rho signaling axis is required for SDF-1-induced migration through CXCR4. *J Biol Chem* 281(51): 39542–39549.
39. Guttridge KL, Smith LD, Miledi R (1995) Xenopus gq alpha subunit activates the phosphatidylinositol pathway in xenopus oocytes but does not consistently induce oocyte maturation. *Proc Natl Acad Sci U S A* 92(5): 1297–1301.
